# Supplementary material for: Bioinspired super-hydrophobic fractal array via a facile electrochemical route: preparation and corrosion inhibition for Cu
Source: Royal Society of Chemistry journal article supplement (doi:10.1039/d1ra06473h), 2021-12-20
Supplement: d1ra06473h1.pdf [file d1ra06473h1.pdf]

## Supplementary file

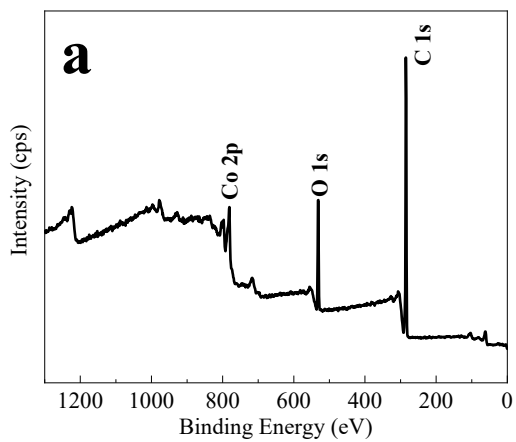

**Fig 2a.** (a) XPS survey spectra of Cu covered with the deposit obtained by electrolysis at 10 V for 20 min
